# Supplementary material for: Gas Migration and Slope Instability in the Danube Fan: Insights from integrated OBS-MCS Seismic Analysis
Source: Copernicus journal article supplement (doi:10.5194/egusphere-2025-5275), 2026-01-30
Supplement: Supplementary file 1 [file egusphere-2025-5275-supplement.pdf]

Supporting information for  
**Gas Migration and Slope Instability in the Danube Fan:  
Insights from Integrated OBS–MCS Seismic Analysis**

H.-S. Hilbert<sup>1</sup>, A. Dannowski<sup>1</sup>, J. Bialas<sup>1</sup>, F. Gross<sup>2,3</sup>, J. Hoffmann<sup>1,4</sup>, D. Klaeschen<sup>1</sup>, C. Berndt<sup>1</sup>

<sup>1</sup> GEOMAR Helmholtz Centre for Ocean Research Kiel, RD Marine Geodynamics, Kiel, Germany

<sup>2</sup> Christian-Albrechts-University Kiel, Institute of Geosciences, Kiel, Germany

<sup>3</sup> Christian-Albrechts-University Kiel, Centre for Ocean and Society, Kiel, Germany

<sup>4</sup> Current affiliation: Alfred-Wegener-Institute, Helmholtz Centre for Polar and Marine Research Sylt,  
Department Coastal Ecology, List, Germany

**Content:**

- Figures S1 to S4 – Forward model assessment
- Tables S1 and S2 – Seismic velocities,  $V_p/V_s$ -ratios, and pick uncertainties for the forward model layers

**S1. Forward model assessment**

A first order assessment of the forward model is typically obtained by a comparison between the observed and synthetic traveltimes derived from ray tracing and the ray coverage. In combination with statistical model parameters, such as the root-mean-square (RMS) misfit, this gives an estimation of the model quality. Figs. S1 and S2 display the observed and modelled traveltime picks and ray coverage of profile X for the P- and S-wave model, respectively. Similarly, Figs. S3 and S4 show the resulting comparison and ray coverage for the P- and S-wave model of profile Y, respectively. In addition, the tables S1 and S2 provide the modelled seismic P- and S-wave velocities, corresponding  $V_p/V_s$ -ratios, and pick uncertainties for each layer of both profiles.

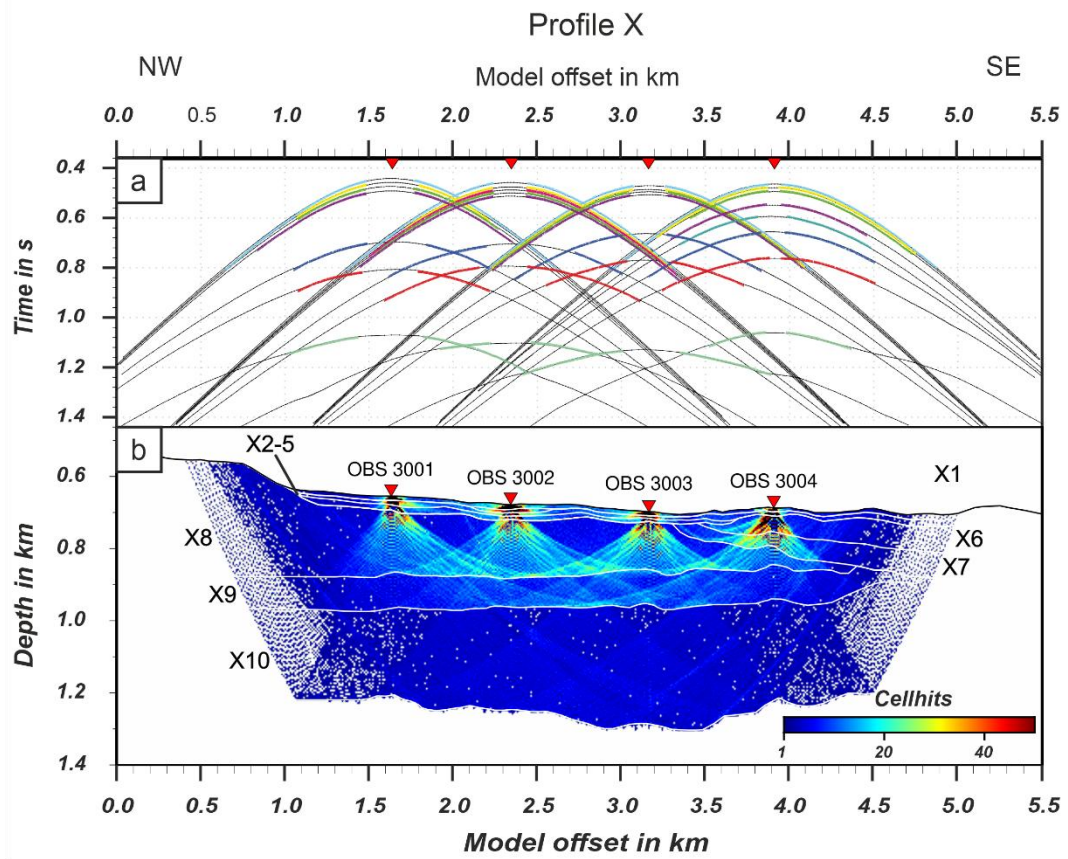

**Fig. S 1:** Forward model assessment for the P-wave velocity model of profile X. (a) Comparison between the observed (coloured lines) and synthetic traveltimes (black lines). (b) Ray coverage based on the ray density within the model cells.

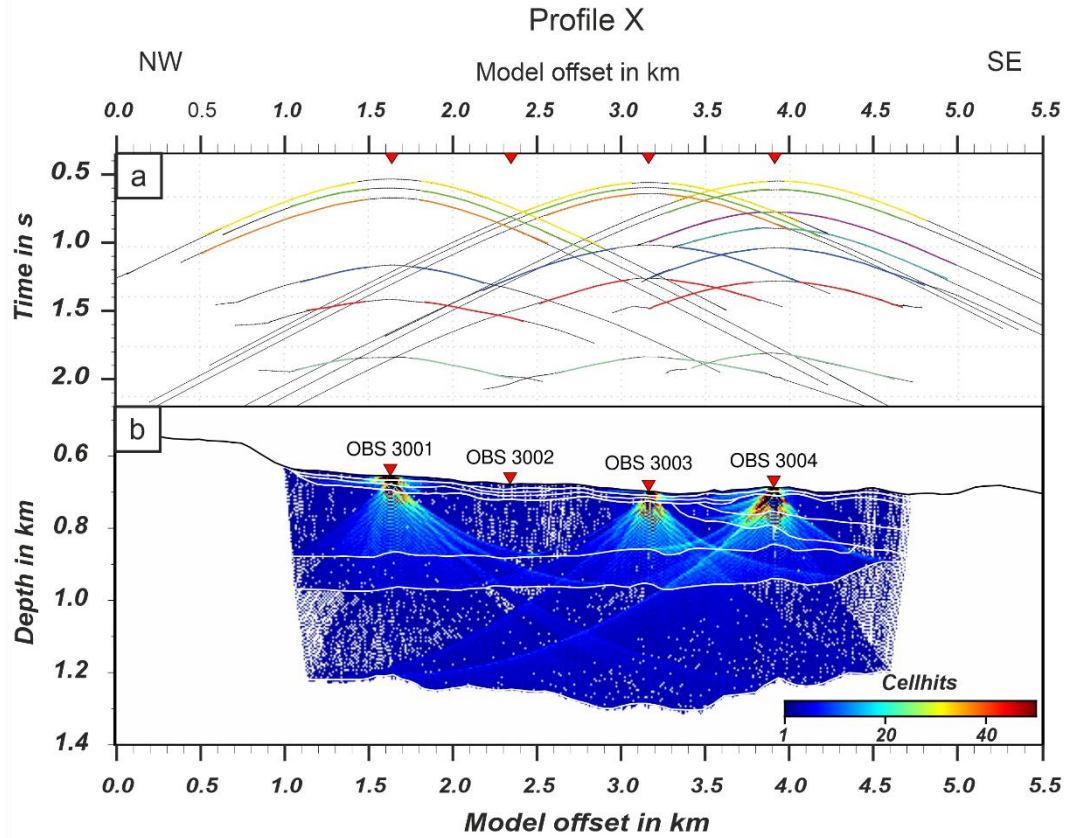

**Fig. S 2:** Forward model assessment for the S-wave velocity model of profile X. (a) Comparison between the observed (coloured lines) and synthetic traveltimes (black lines). (b) Ray coverage based on the ray density within the model cells.

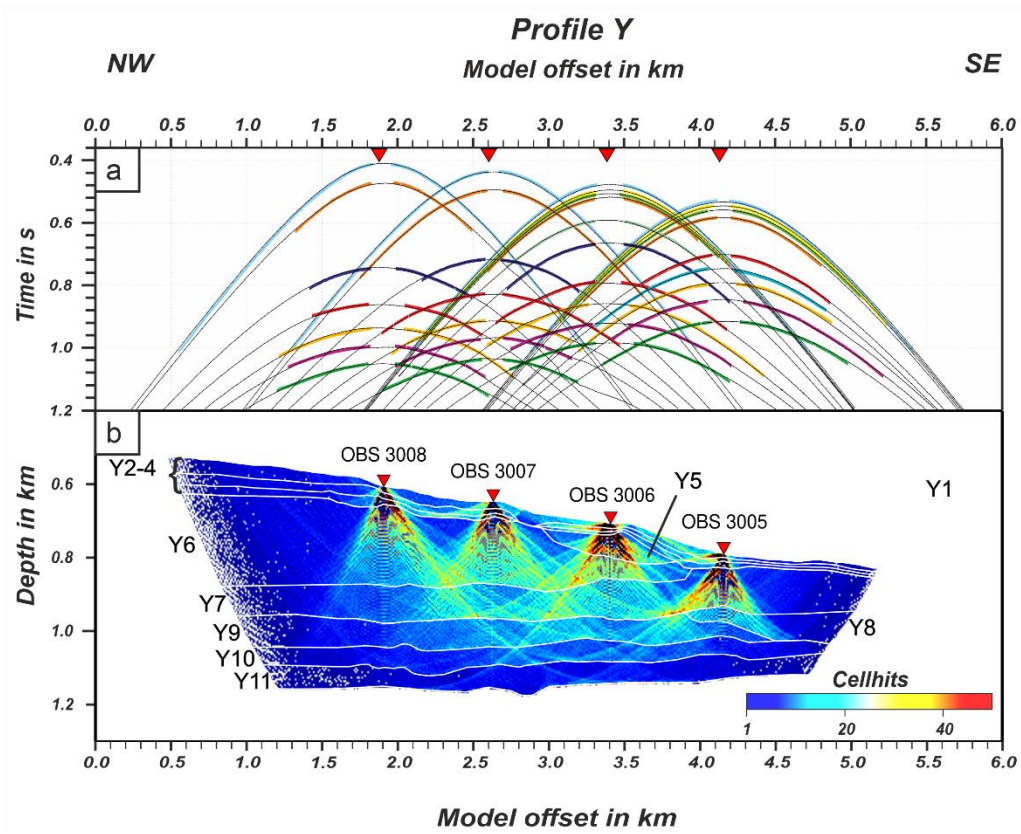

**Fig. S 3:** Forward model assessment for the P-wave velocity model of profile Y. (a) Comparison between the observed (coloured lines) and synthetic traveltimes (black lines). (b) Ray coverage based on the ray density within the model cells.

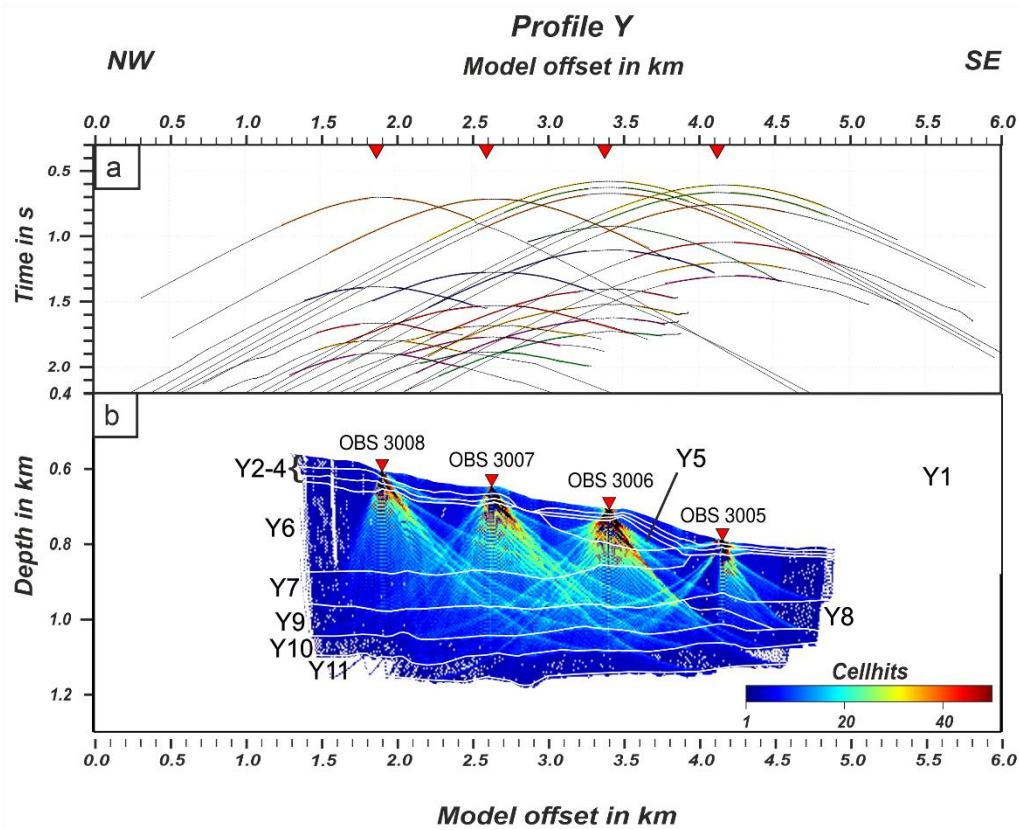

**Fig. S 4:** Forward model assessment for the S-wave velocity model of profile Y. (a) Comparison between the observed (coloured lines) and synthetic traveltimes (black lines). (b) Ray coverage based on the ray density within the model cells.

## Supplement of Solid Earth

**Table S 1:** Modelled seismic velocities,  $V_p/V_s$ -ratios, and the corresponding pick uncertainties for each layer (top to bottom) for profile X.

| Layer | $V_p$ (m/s) | $V_s$ (m/s) | $V_p/V_s$ -ratio | Pick uncertainty (P-/ S-wave model) |             |
|-------|-------------|-------------|------------------|-------------------------------------|-------------|
| X1    | 1483        |             |                  | 5 ms / 5 ms                         | Water layer |
| X2    | 1510        | 140         | 10.6             | 5 ms / 7 ms                         | Unit 1      |
| X3    | 1510        | 150         | 10               | 6 ms / -                            |             |
| X4    | 1520        | 210         | 7.2              | 7 ms / 11 ms                        |             |
| X5    | 1530        | 230         | 6.8              | 7 ms / 12 ms                        |             |
| X6    | 1580-1620   | 320         | 5                | 7 ms / 16 ms                        | Unit 2      |
| X7    | 1680-1720   | 420-430     | 4                | 10 ms / 18 ms                       |             |
| X8    | 1640-1760   | 430-460     | 3.8              | 15 ms / 20 ms                       |             |
| X9    | 1760-1800   | 500-510     | 3.6              | 16 ms / 20 ms                       | Unit 3      |
| X10   | 1800-1900   | 820-860     | 2.2              | 18 ms / 24 ms                       |             |

**Table S 2:** Modelled seismic velocities,  $V_p/V_s$ -ratios, and the corresponding pick uncertainties for each layer (top to bottom) for profile Y.

| Layer                               | Vp (m/s)  | Vs (m/s) | Vp/Vs-ratio | Pick uncertainty (P-/ S-wave model) |             |
|-------------------------------------|-----------|----------|-------------|-------------------------------------|-------------|
| Y1                                  | 1483      |          |             | 5 ms / 5 ms                         | Water layer |
| Y2                                  | 1510      | 140      | 10.6        | 5 ms / 7 ms                         | Unit 1      |
| Y3                                  | 1520      | 210      | 7.2         | 6 ms / 10 ms                        |             |
| Y4                                  | 1530      | 230      | 6.8         | 7 ms / 12 ms                        |             |
| Y5                                  | 1600-1640 | 280-285  | 5.8         | 10 ms / 12 ms                       | Unit 2      |
| Y6                                  | 1640-1660 | 410-420  | 4           | 9 ms / 16 ms                        |             |
| Y7                                  | 1670-1780 | 450-480  | 3.7         | 10 ms / 18 ms                       |             |
| Y8                                  | 1800-1970 | 490-530  | 3.7         | 12 ms / no picks*                   | Unit 3      |
| Y9                                  | 1780-1820 | 710-730  | 2.5         | 12 ms / 20 ms                       |             |
| Y10                                 | 1820-1850 | 780-790  | 2.4         | 15 ms / 21 ms                       |             |
| Y11                                 | 1850-1900 | 790-810  | 2.4         | 17 ms / 21 ms                       |             |
| * Vs estimated for model continuity |           |          |             |                                     |             |
